# Supplementary material for: A Mediterranean-Style Diet Improves the Parameters for the Management and Prevention of Type 2 Diabetes Mellitus
Source: MDPI journal article supplement (doi:10.3390/medicina59101882), 2023-10-23
Supplement: s1 [file s1]

## Supplemental Materials

**Table S1.** NIDDK guidelines for the classification of type 2 diabetes mellitus and prediabetes.

| Diagnosis   | Hemoglobin A1c<br>(HbA1c, %) | Fasting Plasma Glucose<br>(FPG, mg/dL) <sup>a</sup> | Oral Glucose Tolerance<br>Test (OGTT, mg/dL) <sup>b</sup> | Random Plasma Glucose<br>test (RPG, mg/dL) <sup>c</sup> |
|-------------|------------------------------|-----------------------------------------------------|-----------------------------------------------------------|---------------------------------------------------------|
| Normal      | < 5.7                        | ≤ 99                                                | ≤ 139                                                     | -                                                       |
| Prediabetes | 5.7 - 6.4                    | 100 - 125                                           | 140 - 199                                                 | -                                                       |
| Diabetes    | ≥ 6.5                        | ≥ 126                                               | ≥ 200                                                     | ≥ 200                                                   |

<sup>a</sup>Performed following a fast of at least 8 hours. <sup>b</sup>2-hour plasma glucose measured following a bolus of glucose equal to 75 g anhydrous glucose dissolved in water. <sup>c</sup>Performed in patients experiencing hyperglycemic crisis or who present with classic symptoms of hyperglycemia. NIDDK, National Institute of Diabetes and Digestive and Kidney Diseases. Source: NIDDK, 2022.
